# Supplementary material
Source: MDPI journal article supplement (https://www.mdpi.com/2073-4395/12/12/3129)
Supplement: s1 [file s1]

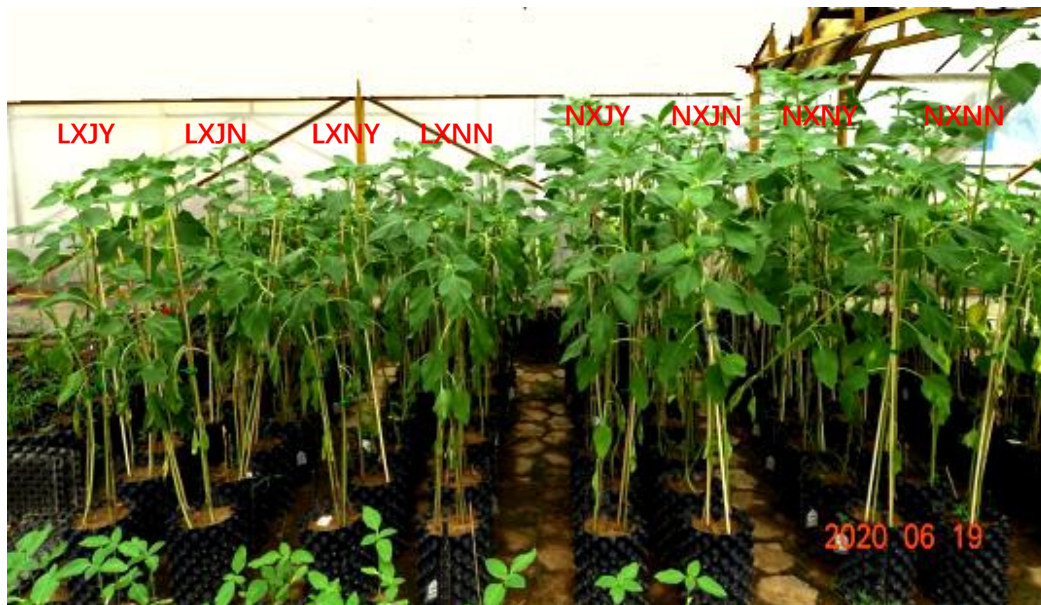

**Figure S1** Growth of sunflower with different treatments (mature stage).

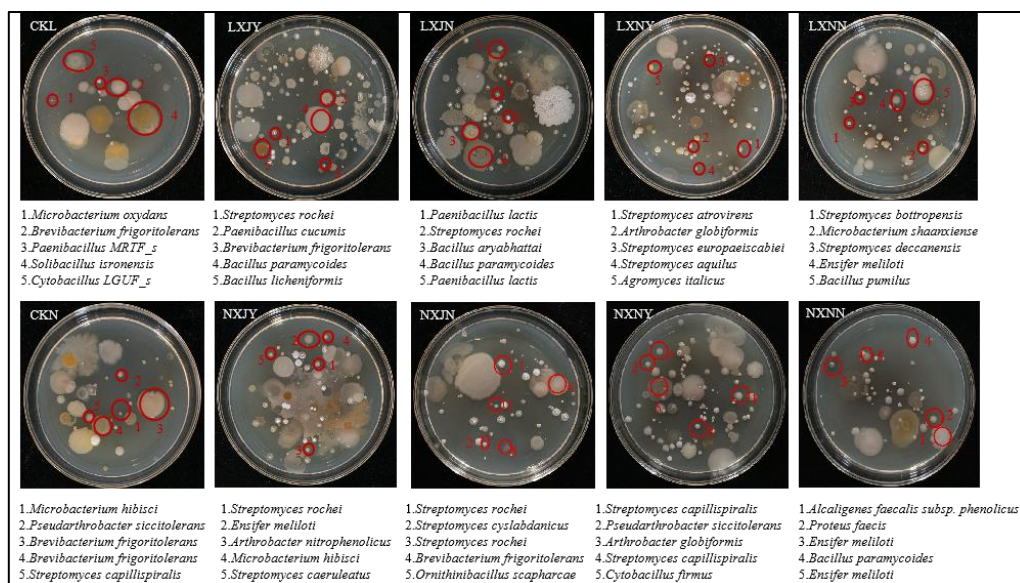

**Figure S2** Effects of different treatments in TSB medium on sunflower rhizosphere soil cultivated bacteria.

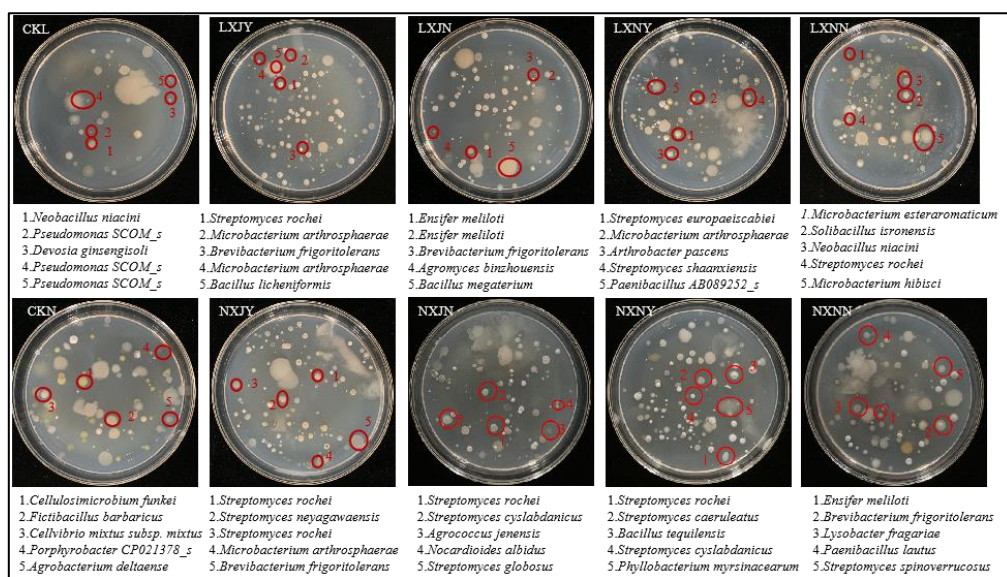

**Figure S3** Effects of different treatments in R2A medium on sunflower rhizosphere soil cultivated bacteria.

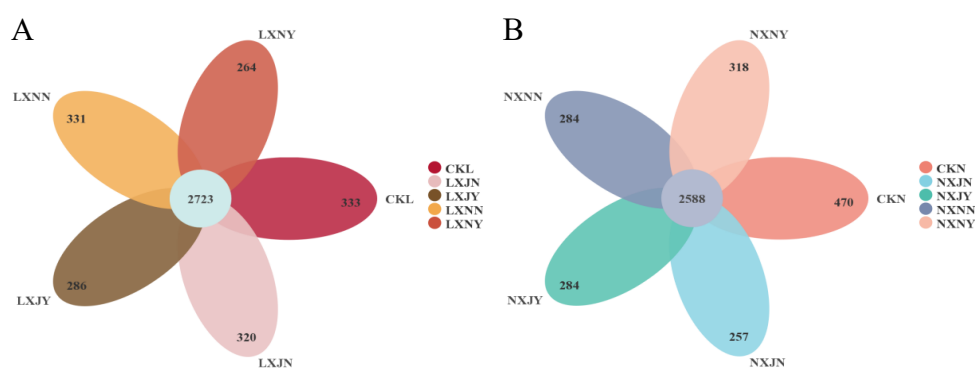

**Figure S4** Comparison of differences in OTUs of sunflower rhizosphere bacterial communities with (A) and without (B) *O. cumana*.

**Table S1.** Effects of different treatments in TSB medium on the number of dominant strains in sunflower rhizosphere soil ( $\times 10^5$ CFU/g).

| Phylum           | Genus                       | CKL   | CKN   | LXJY   | LXJN  | LXNY   | LXNN  | NXJY  | NXJN  | NXNY  | NXNN  | Total  |
|------------------|-----------------------------|-------|-------|--------|-------|--------|-------|-------|-------|-------|-------|--------|
| Actinobacteria   | <i>Microbacterium</i>       | 47.62 | 26.13 | —      | —     | —      | 20.88 | 6.99  | —     | —     | —     | 101.62 |
|                  | <i>Pseudarthrobacter</i>    | —     | 14.25 | —      | —     | —      | —     | —     | —     | 7.13  | —     | 21.38  |
|                  | <i>Streptomyces</i>         | —     | 7.13  | 70.94  | 27.21 | 104.9  | 30.16 | 55.94 | 46.51 | 14.25 | —     | 357.04 |
|                  | <i>Arthrobacter</i>         | —     | —     | —      | —     | 11.66  | —     | 11.66 | —     | 7.13  | —     | 30.45  |
|                  | <i>Agromyces</i>            | —     | —     | —      | —     | 11.66  | —     | —     | —     | —     | —     | 11.66  |
|                  | <i>Brevibacterium</i>       | 19.05 | 19    | 11.44  | —     | —      | —     | —     | 6.98  | —     | 7.03  | 56.47  |
| Firmicutes       | <i>Paenibacillus</i>        | 19.05 | —     | 57.21  | 36.28 | —      | —     | —     | —     | —     | —     | 112.54 |
|                  | <i>Solibacillus</i>         | 7.14  | —     | —      | —     | —      | —     | —     | —     | —     | —     | 7.14   |
|                  | <i>Cytobacillus</i>         | 7.14  | —     | —      | —     | —      | —     | —     | —     | 7.13  | —     | 14.27  |
|                  | <i>Bacillus</i>             | —     | —     | 6.86   | 13.61 | —      | 6.96  | —     | —     | —     | —     | 34.46  |
|                  | <i>Ornithinibacillus</i>    | —     | —     | —      | —     | —      | —     | —     | 4.65  | —     | —     | 4.65   |
|                  | <i>Ensifer</i>              | —     | —     | —      | —     | —      | 11.6  | 13.99 | —     | —     | 9.37  | 34.96  |
| Proteobacteria   | <i>Alcaligenes faecalis</i> | —     | —     | —      | —     | —      | —     | —     | —     | —     | 9.37  | 9.37   |
|                  | <i>Proteus</i>              | —     | —     | —      | —     | —      | —     | —     | —     | —     | 7.01  | 7.01   |
| Total of strains |                             | 100   | 66.51 | 146.45 | 77.1  | 128.22 | 69.6  | 88.58 | 58.14 | 35.64 | 32.78 |        |
| Total of genus   | 14                          | 5     | 4     | 4      | 3     | 3      | 4     | 4     | 3     | 4     | 4     |        |

**Table S2.** Effects of different treatments in R2A medium on the number of dominant strains in sunflower rhizosphere soil ( $\times 10^5$ CFU/g).

| Phylum           | Genus                     | CKL   | CKN   | LXJY   | LXJN   | LXNY  | LXNN   | NXJY   | NXJN  | NXNY   | NXNN  | 合计     |
|------------------|---------------------------|-------|-------|--------|--------|-------|--------|--------|-------|--------|-------|--------|
| Actinobacteria   | <i>Pseudomonas</i>        | 30.95 | —     | —      | —      | —     | —      | —      | —     | —      | —     | 30.95  |
|                  | <i>Cellulosimicrobium</i> | —     | 45.13 | —      | —      | —     | —      | —      | —     | —      | —     | 45.13  |
|                  | <i>Streptomyces</i>       | —     | —     | 162.47 | 20.41  | 44.29 | 11.6   | 125.87 | 53.49 | 95.01  | 4.68  | 517.82 |
|                  | <i>Microbacterium</i>     | —     | —     | 25.17  | —      | 27.97 | 44.08  | 16.32  | —     | —      | —     | 113.54 |
|                  | <i>Agromyces</i>          | —     | —     | —      | 9.07   | —     | —      | —      | —     | —      | —     | 9.07   |
|                  | <i>Arthrobacter</i>       | —     | —     | —      | —      | 13.99 | —      | —      | —     | —      | —     | 13.99  |
|                  | <i>Nonomuraea</i>         | —     | —     | —      | —      | —     | —      | —      | 11.63 | —      | —     | 11.63  |
|                  | <i>Agrococcus</i>         | —     | —     | —      | —      | —     | —      | —      | 13.95 | —      | —     | 13.95  |
|                  | <i>Neobacillus</i>        | 16.67 | —     | —      | —      | —     | 13.92  | —      | —     | —      | —     | 30.59  |
| Firmicutes       | <i>Fictibacillus</i>      | —     | 14.25 | —      | —      | —     | —      | —      | —     | —      | —     | 14.25  |
|                  | <i>Bacillus</i>           | —     | —     | 4.58   | 4.54   | —     | —      | —      | —     | 19.0   | —     | 28.12  |
|                  | <i>Brevibacterium</i>     | —     | —     | 13.73  | —      | —     | —      | 11.66  | —     | —      | 9.37  | 34.76  |
|                  | <i>Paenibacillus</i>      | —     | —     | —      | —      | 11.66 | —      | —      | —     | —      | 4.68  | 16.34  |
|                  | <i>Solibacillus</i>       | —     | —     | —      | —      | —     | 25.52  | —      | —     | —      | —     | 25.52  |
|                  | <i>Devosia</i>            | 14.29 | —     | —      | —      | —     | 5      | —      | —     | —      | —     | 19.29  |
|                  | <i>Cellvibrio mixtus</i>  | —     | 7.13  | —      | —      | —     | —      | —      | —     | —      | —     | 7.13   |
|                  | <i>Porphyrobacter</i>     | —     | 9.5   | —      | —      | —     | —      | —      | —     | —      | —     | 9.5    |
|                  | <i>Rhizobium</i>          | —     | 18    | —      | —      | —     | —      | —      | —     | —      | —     | 18     |
| Proteobacteria   | <i>Lysobacter</i>         | —     | —     | —      | —      | —     | —      | —      | —     | —      | 7.03  | 7.03   |
|                  | <i>Ensifer</i>            | —     | —     | —      | 72.56  | —     | —      | —      | —     | —      | 21.08 | 93.64  |
|                  | <i>Phyllobacterium</i>    | —     | —     | —      | —      | —     | —      | —      | —     | 7.13   | —     | 7.13   |
| Total of strains |                           | 61.91 | 94.01 | 205.95 | 106.58 | 97.91 | 100.12 | 153.85 | 79.07 | 121.14 | 46.84 |        |
| Total of genus   |                           | 21    | 3     | 5      | 4      | 4     | 4      | 3      | 3     | 3      | 5     |        |

**Table S3.**  $\alpha$ - diversity index analysis of sunflower rhizosphere bacterial community.

| Group | ACE              | observed OTUs | chao1      | shannon      |
|-------|------------------|---------------|------------|--------------|
| CKL   | 4378.67±97.35ab  | 3264±60ab     | 4291±86ab  | 9.678±0.039a |
| LXJY  | 4051.80±148.31ab | 3140±38abc    | 4002±170ab | 9.740±0.006a |
| LXJN  | 4264.82±153.48ab | 3200±66ab     | 4223±179ab | 9.687±0.051a |
| LXNY  | 3827.16±324.34ab | 2984±114bc    | 3771±340ab | 9.596±0.028a |
| LXNN  | 3936.75±338.24ab | 3079±144abc   | 3842±340ab | 9.673±0.084a |
| CKN   | 4412.44±53.51a   | 3333±41a      | 4372±67a   | 9.752±0.045a |
| NXJY  | 4020.15±102.56ab | 3034±34abc    | 3993±95ab  | 9.656±0.020a |
| NXJN  | 3900.41±148.14ab | 2963±103bc    | 3804±157ab | 9.320±0.359a |
| NXNY  | 4092.56±393.06ab | 3121±159abc   | 4021±400ab | 9.639±0.055a |
| NXNN  | 3655.16±152.39b  | 2835±130c     | 3538±173b  | 9.253±0.269a |
